# Supplementary material
Source: PubMed Central journal article supplement (PMC8061579)

Supplementary Figure 1. Flowchart of study participants and metabolites.

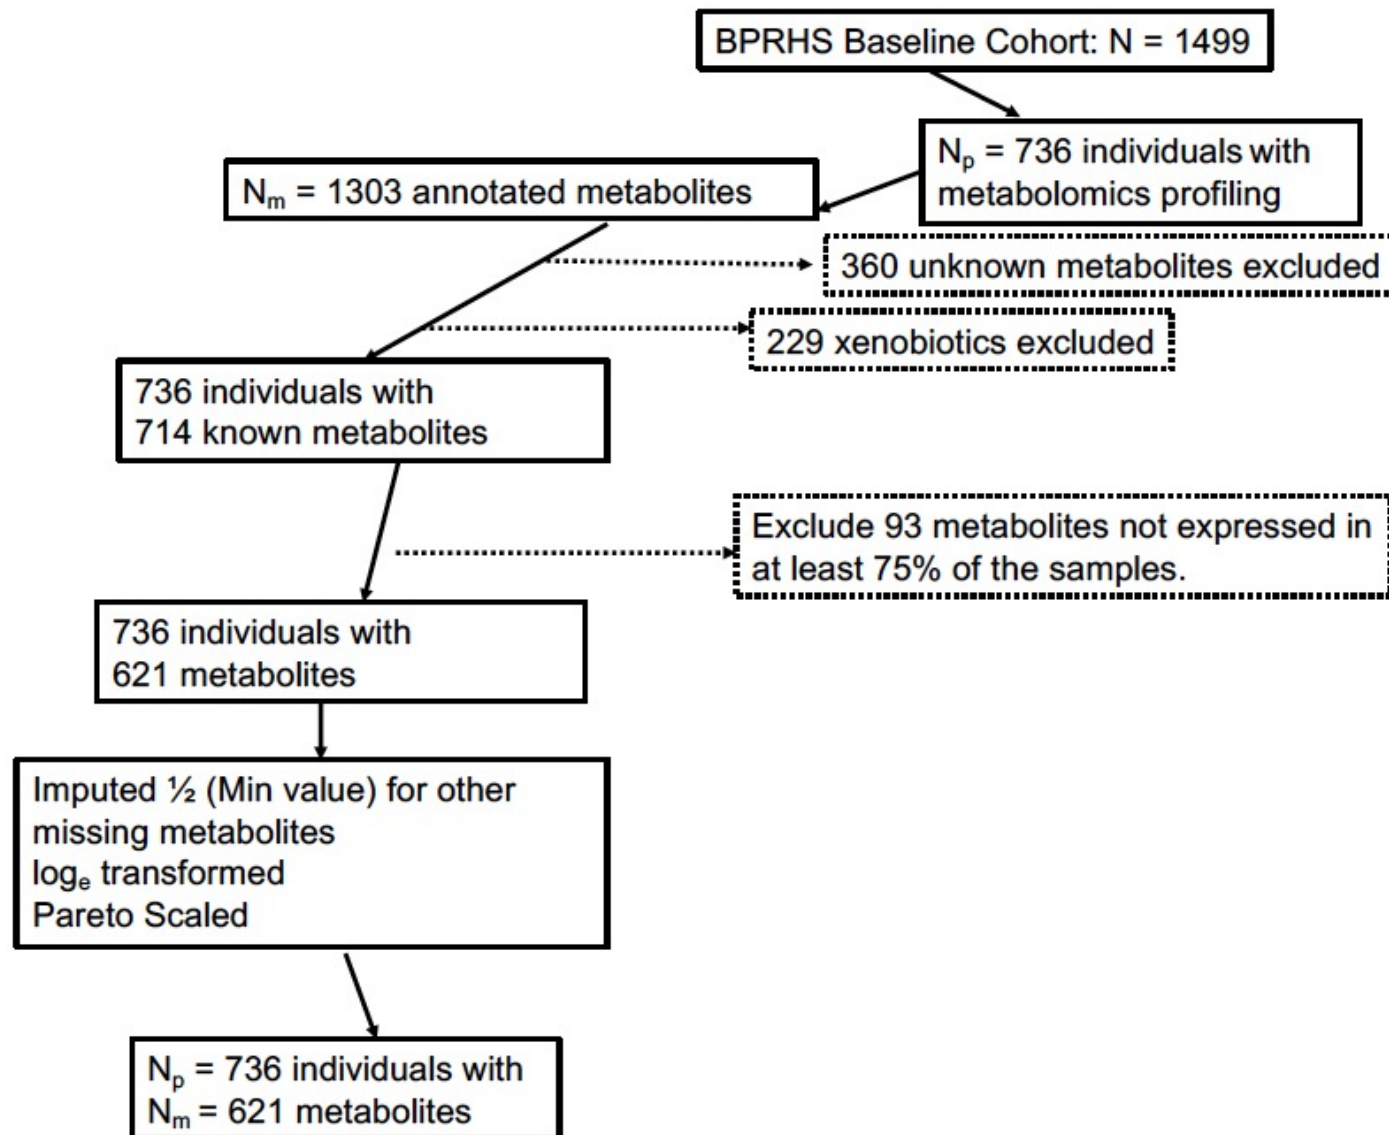

Supplementary Figure 2. ROC curves for LASSO regression in whole cohort analyses (N = 736).

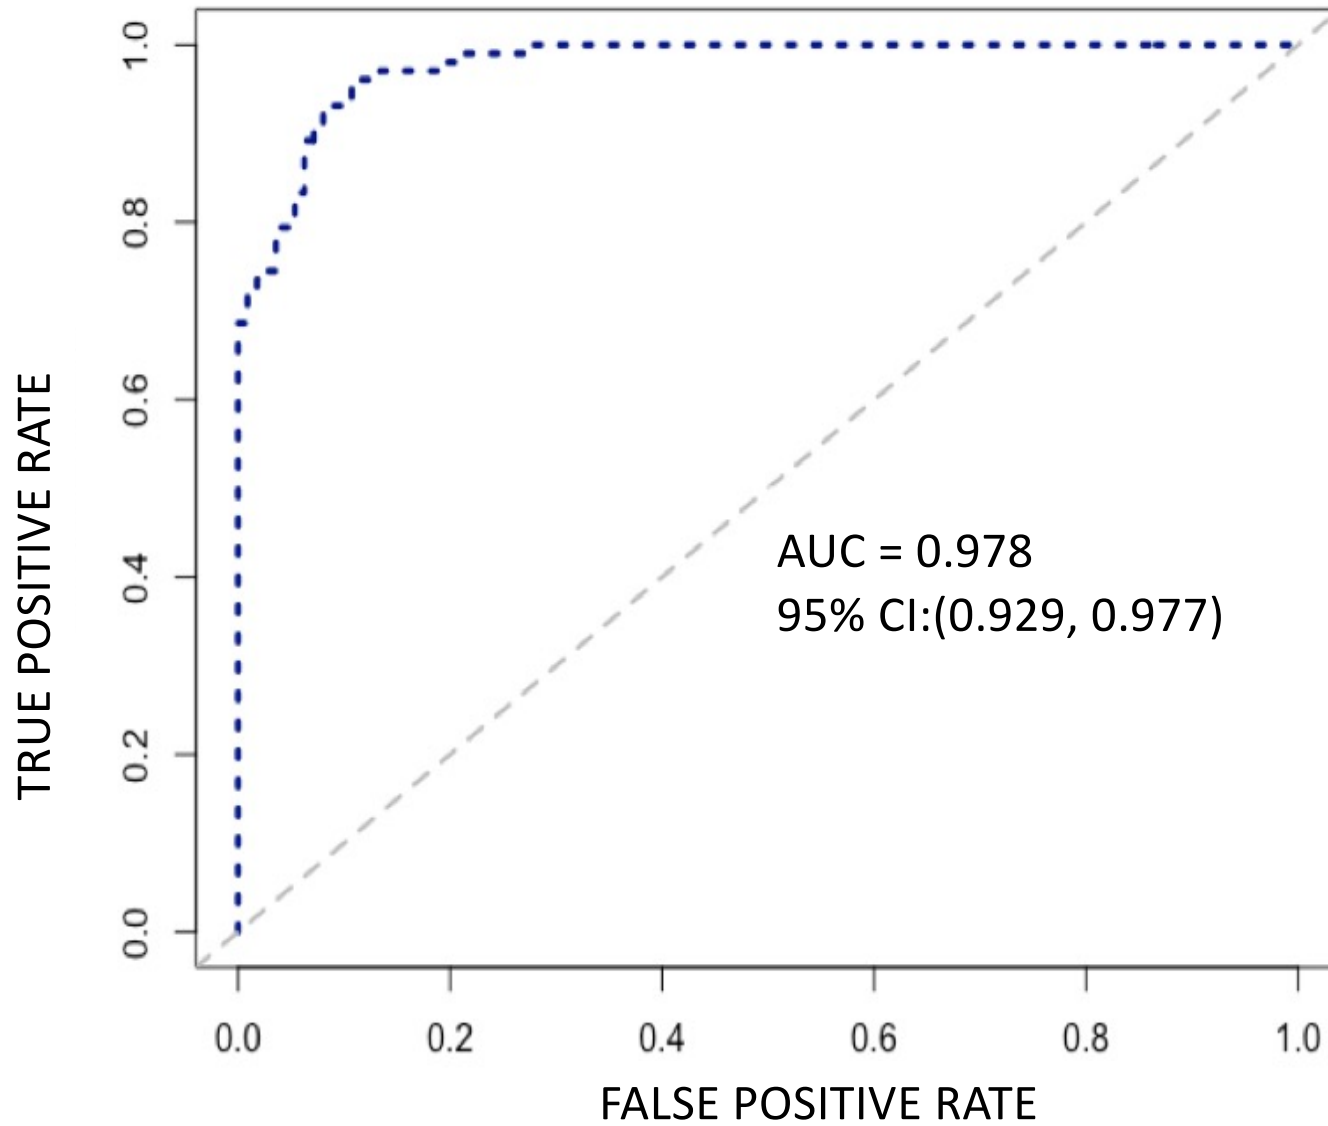

Supplement: NIHMS1691456-supplement-Supplementary_Figures_1___2.pdf [file NIHMS1691456-supplement-Supplementary_Figures_1___2.pdf]
